# Supplementary material
Source: HighWire-hosted journal article supplement (http://hw-f5-jim.highwire.org/highwire/filestream/140414/field_highwire_adjunct_files/1/AFMR_National_Council_70_2.pdf)
Supplement: AFMR_National_Council_70_2.pdf [file AFMR_National_Council_70_2.pdf]

**2021-2022 AFMR National Council**  
View Bios online at [www.afmr.org/leadership](http://www.afmr.org/leadership).

**National Council**

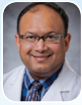

Samrat U. Das, MD  
President

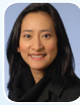

Attaya Suvannasankha, MD  
President-elect

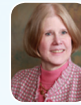

Janice P. Dutcher, MD  
Immediate Past-President

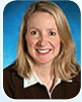

Leticia Ryan, MD, MPH  
Past-President

**Committee Chairs**

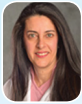

Shireen Atabaki, MD, MPH  
Membership Committee Chair

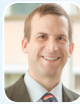

John Dickinson, MD, PhD  
Publications Committee Chair

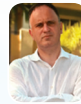

Theo Trandafirescu, MD  
VP of Meetings and Programs

**Councilors-at-Large**

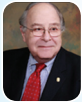

Peter Wiernik, MD

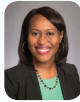

Zanthia Wiley, MD

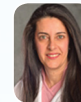

Shireen Atabaki, MD, MPH

**Ex-Officio**

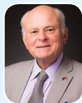

Richard W. McCallum, MD  
Editor-in-Chief, *Journal of Investigative Medicine*

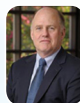

Michael J. McPhaul, MD  
Editor-in-Chief, *Journal of Investigative Medicine High Impact Case reports*

**Regional Leadership**

The below executive positions in regional leadership hold seats on the National Council.

**Eastern Section Council**

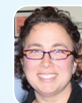

Lora Kasselmann, PhD, MPH  
Chair

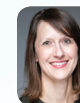

Andrea L Hahn, MD  
Chair-Elect

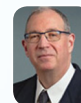

Joshua DeLeon, MD  
Secretary-Treasurer

**Midwest Section Council**

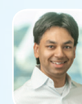

Sidharth Mahapatra, MD, PhD  
Chair

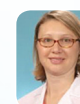

Jennifer Alexander-Brett, MD, PhD  
Chair-Elect

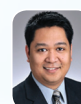

Dubert Guerrero, MD  
Secretary-Treasurer

**Southern Section Council**

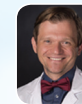

Alexander Philipovskiy, MD  
Chair

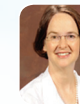

Stephanie L. Baer, MD  
Chair-Elect

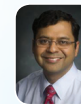

Gaurav Agarwal, MD  
Secretary-Treasurer

**Western Section Council**

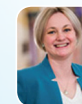

Melanie Cree-Green, MD, PhD  
Chair

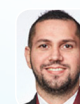

Ricardo Correa, MD  
Chair-Elect

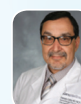

Everardo Cobos, MD  
Secretary-Treasurer

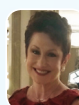

Aurelie Alger, JD  
Supervising Director
